# Supplementary material for: A digital image-based method employing a spot-test for quantification of ethanol in drinks
Source: Royal Society of Chemistry journal article supplement (doi:10.1039/c5ay00529a), 2015-01-01
Supplement: c5ay00529a1.pdf [file c5ay00529a1.pdf]

ARTICLE

## A digital image-based method employing a spot-test for quantification of ethanol in drinks

Cite this: DOI:  
10.1039/C4AY01811G

Received 31 Jul 2014,

Accepted 27 Aug 2014

[www.rsc.org/](http://www.rsc.org/)

Luzia Pires dos Santos Benedetti,<sup>a</sup> Vagner Bezerra dos Santos,<sup>a\*</sup> Tiago Almeida Silva,<sup>a</sup> Edemar Benedetti Filho,<sup>b</sup> Valdomiro Lacerda Martins<sup>c</sup> and Orlando Fatibello-Filho<sup>a</sup>

### Electronic Supplementary Information (ESI)

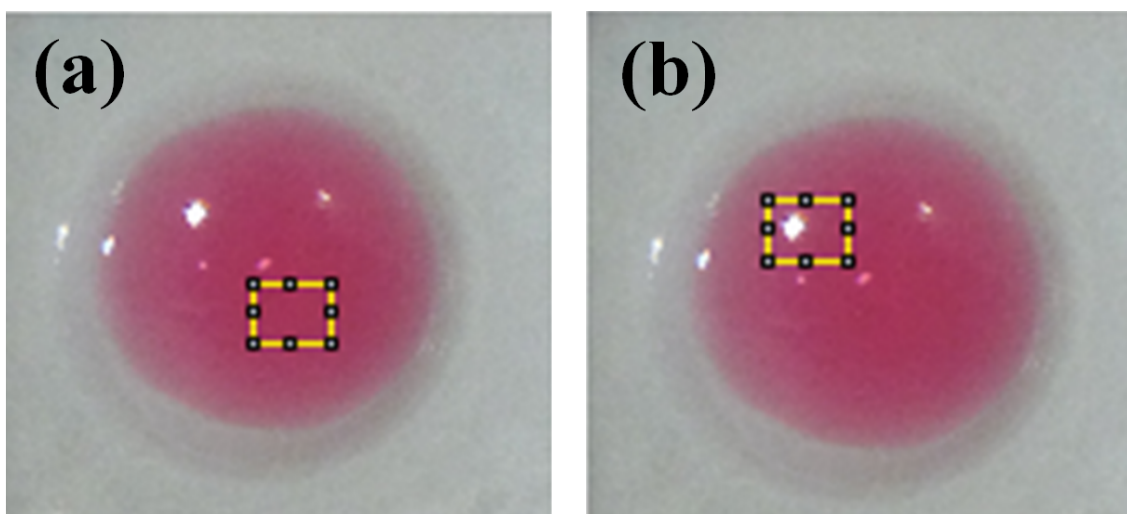

Fig. S1. Different regions selected from the same image of a  $1.0 \times 10^{-4} \text{ mol L}^{-1}$  amaranth solution showing the selection of a (a) without and (b) brightness region.

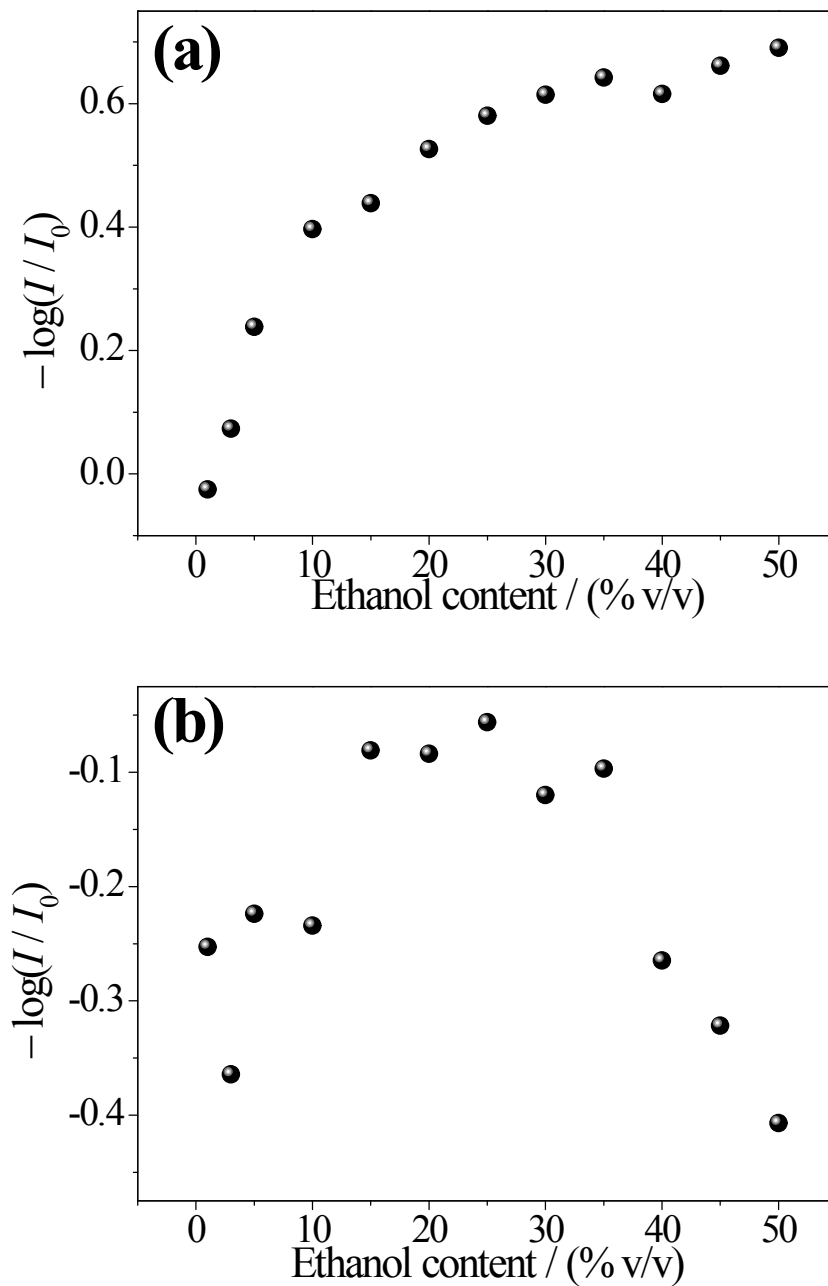

Fig. S2. Data obtained for different ethanol content (1.0 to 50.0% v/v) using the channels (a) G and (b) B.

Table S1. Results of mean, mode and standard deviation (SD) of the RGB channels obtained for selected areas of a same image of a  $1.0 \times 10^{-4}$  mol L<sup>-1</sup> amaranth solution (Fig. S1) with and without brightness.

| Without Brightness |      |      |    | Brightness |      |      |    |
|--------------------|------|------|----|------------|------|------|----|
| Channel            | Mean | Mode | SD | Channel    | Mean | Mode | SD |
| R                  | 162  | 163  | 2  | R          | 171  | 165  | 21 |
| G                  | 55   | 54   | 2  | G          | 88   | 85   | 43 |
| B                  | 89   | 89   | 2  | B          | 119  | 110  | 36 |
